# Supplementary material
Source: publisher figshare collection journal article supplement (https://acs.figshare.com/ndownloader/files/4299946)

# checkCIF/PLATON report

No syntax errors found.      CIF dictionary      Interpreting this report

## Datablock: phloro\_100k

---

Bond precision:    C-C = 0.0012 Å      Wavelength=0.71075

Cell:                    a=6.5942(4)      b=13.5455(9)      c=8.0423(3)  
                          alpha=90      beta=90      gamma=90  
Temperature:      100 K

|                | Calculated        | Reported    |
|----------------|-------------------|-------------|
| Volume         | 718.35(7)         | 718.35(7)   |
| Space group    | P n m a           | Pnma        |
| Hall group     | -P 2ac 2n         | ?           |
| Moiety formula | C6 H6 O3, 2(H2 O) | ?           |
| Sum formula    | C6 H10 O5         | C6 H10 O5   |
| Mr             | 162.14            | 162.14      |
| Dx,g cm-3      | 1.499             | 1.499       |
| Z              | 4                 | 4           |
| Mu (mm-1)      | 0.132             | 0.132       |
| F000           | 344.0             | 344.0       |
| F000'          | 344.26            |             |
| h,k,lmax       | 8,17,10           | 8,17,10     |
| Nref           | 866               | 860         |
| Tmin,Tmax      | 0.954,0.974       | 0.897,0.968 |
| Tmin'          | 0.949             |             |

Correction method= MULTI-SCAN

Data completeness= 0.993      Theta(max)= 27.470

R(reflections)= 0.0357( 818)      wR2(reflections)= 0.1086( 860)

S = 1.132      Npar= 82

---

The following ALERTS were generated. Each ALERT has the format

**test-name\_ALERT\_alert-type\_alert-level.**

Click on the hyperlinks for more details of the test.

---

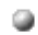

### Alert level G

PLAT764\_ALERT\_4\_G Overcomplete CIF Bond List Detected (Rep/Expd) .      1.17 Ratio

---

- 0 ALERT level A = In general: serious problem
- 0 ALERT level B = Potentially serious problem
- 0 ALERT level C = Check and explain

1 **ALERT level G** = General alerts; check

0 ALERT type 1 CIF construction/syntax error, inconsistent or missing data  
0 ALERT type 2 Indicator that the structure model may be wrong or deficient  
0 ALERT type 3 Indicator that the structure quality may be low  
1 ALERT type 4 Improvement, methodology, query or suggestion  
0 ALERT type 5 Informative message, check

---

### **Publication of your CIF in IUCr journals**

**A basic structural check has been run on your CIF. These basic checks will be run on all CIFs submitted for publication in IUCr journals (*Acta Crystallographica*, *Journal of Applied Crystallography*, *Journal of Synchrotron Radiation*); however, if you intend to submit to *Acta Crystallographica Section C* or *E*, you should make sure that full publication checks are run on the final version of your CIF prior to submission.**

### **Publication of your CIF in other journals**

**Please refer to the *Notes for Authors* of the relevant journal for any special instructions relating to CIF submission.**

---

**PLATON version of 29/06/2010; check.def file version of 26/06/2010**

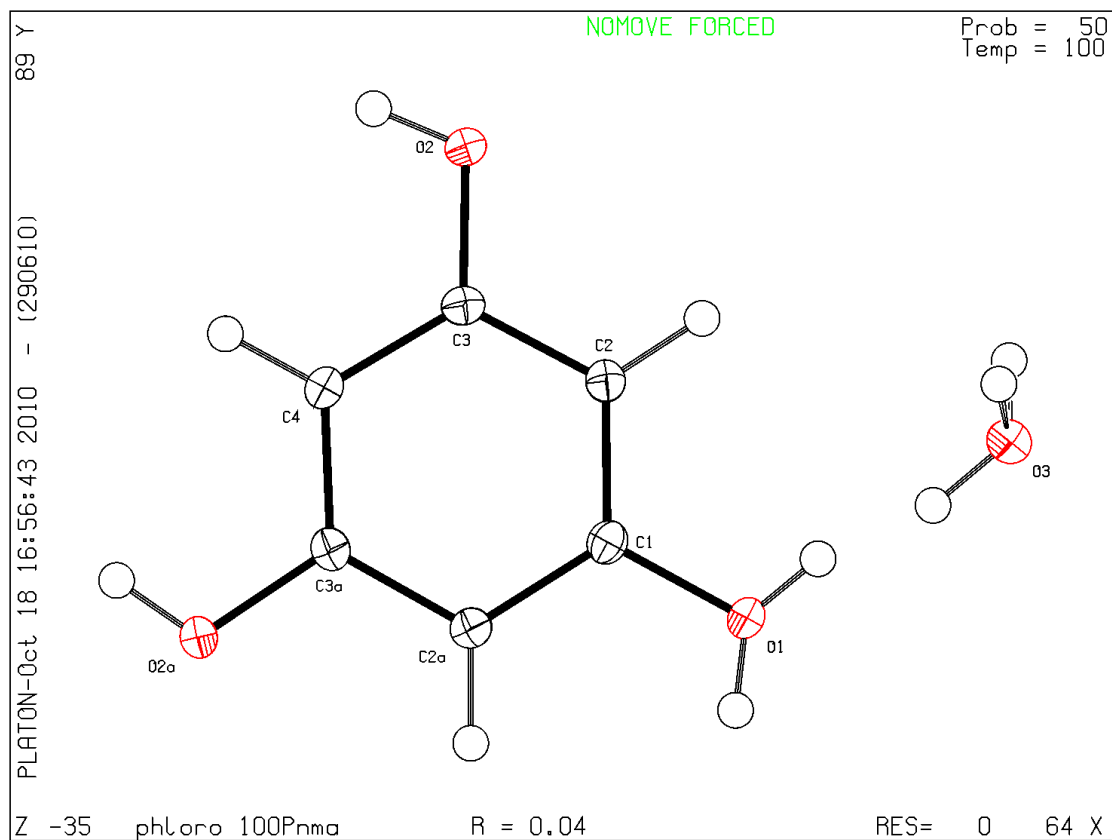

Supplement: Supplementary file 1 [file 4299946 › checkcif.pdf]
