# Supplementary material
Source: publisher figshare collection journal article supplement (https://acs.figshare.com/ndownloader/files/4299946)
Supplement: Supplementary file 1 [file 4299946]

Archive with 4 entries (4 files):
- PGLOH_Pna21_calc.cif
- phloro_expt.cif
- checkcif.pdf
- PGLOH_P212121_calc.cif
