# Supplementary material
Source: publisher figshare collection journal article supplement (https://acs.figshare.com/ndownloader/files/4299946)
Supplement: Supplementary file 1 [file 4299946 › PGLOH_P212121_calc.cif]

 #########################################################
 #  CIF FILE GENERATED FROM SYMMETRY AVERAGED POSITIONS  #
 #      USING MAPPING PROGRAM TO COLLATE MD RUN DATA     #
 ###################################################AMR###
 data_CSD_CIF_MAPPER
 _audit_creation_date 2007-01-22
 _audit_creation_method MAPPER_PROG
 _cell_volume    717.6682    
 _symmetry_cell_setting orthorhombic
 _symmetry_space_group_name_H-M 'P 21 21 21'
 _symmetry_Int_Tables_number 19
 loop_
 _symmetry_equiv_pos_site_id
 _symmetry_equiv_pos_as_xyz
 1 x,y,z
 2 1/2+x,1/2-y,-z
 3 -x,1/2+y,1/2-z
 4 1/2-x,-y,1/2+z
 _cell_length_a   6.601000    
 _cell_length_b   13.52640    
 _cell_length_c   8.037700    
 _cell_angle_alpha   90.00000    
 _cell_angle_beta   90.00000    
 _cell_angle_gamma   90.00000    
 loop_
 _atom_type_symbol
 _atom_type_radius_bond
 C 0.68
 D 0.23
 H 0.23
 N 0.68
 O 0.68
 Li 0.70
 loop_
 _atom_site_label
 _atom_site_type_symbol
 _atom_site_U_iso_or_equiv
 _atom_site_fract_x
 _atom_site_fract_y
 _atom_site_fract_z
   1 C   Uani 0.127893 0.162717 0.818691
   2 C   Uani 0.120862 0.160750 0.643744
   3 C   Uani 0.122988 0.339858 0.817214
   4 C   Uani 0.115800 0.340628 0.642384
   5 C   Uani 0.115776 0.250404 0.557244
   6 C   Uani 0.129643 0.251607 0.908220
   7 O   Uani 0.367995 0.926254 0.399027
   8 O   Uani 0.388935 0.746574 0.886982
   9 O   Uani 0.378254 0.570417 0.395509
  10 O   Uani 0.641278 0.425218 0.765868
  11 O   Uani 0.358857 0.567834 0.726965
  12 H   Uani 0.119327 0.091227 0.577001
  13 H   Uani 0.142801 0.081978 1.022594
  14 H   Uani 0.108976 0.409597 0.574223
  15 H   Uani 0.135409 0.422720 1.019150
  16 H   Uani 0.116675 0.186051 0.338000
  17 H   Uani 0.533526 0.475412 0.750127
  18 H   Uani 0.759856 0.459641 0.723522
  19 H   Uani 0.135566 0.251729 0.043624
  20 H   Uani 0.241112 0.536069 0.777508
  21 H   Uani 0.374328 0.632442 0.784058
 loop_
 _atom_site_aniso_label
 _atom_site_aniso_U_11
 _atom_site_aniso_U_22
 _atom_site_aniso_U_33
 _atom_site_aniso_U_12
 _atom_site_aniso_U_23
 _atom_site_aniso_U_13
   1 0.044573 0.010185 0.019965 0.001515 0.002122 0.001820
   2 0.045671 0.009958 0.020168 -.000919 0.001362 -.000004
   3 0.045150 0.009570 0.019479 -.000227 0.000091 0.004137
   4 0.046742 0.009480 0.019702 0.001700 0.000691 0.001936
   5 0.013281 0.009513 0.018881 -.000211 0.001142 -.000600
   6 0.019969 0.011362 0.019214 0.000497 0.001092 0.002738
   7 0.159486 0.013503 0.021836 0.006526 -.003554 -.004092
   8 0.028907 0.012038 0.019313 -.000297 -.001164 0.001982
   9 0.161324 0.011812 0.020677 -.001951 0.001386 -.009019
  10 0.091292 0.014032 0.027753 0.000458 0.002182 0.000203
  11 0.102570 0.016426 0.023570 0.000117 -.002272 0.000137
  12 0.137949 0.013998 0.027687 -.001583 -.002086 -.000337
  13 0.129899 0.018189 0.022673 0.005330 0.004255 0.004493
  14 0.138684 0.012998 0.026229 0.005322 0.003985 0.002709
  15 0.131435 0.016029 0.021841 -.002335 -.002120 0.008403
  16 0.043445 0.015324 0.022566 -.003696 -.000902 -.001628
  17 0.119698 0.024475 0.023009 0.018692 0.004031 0.002503
  18 0.112064 0.039158 0.048378 -.025862 -.009071 0.005890
  19 0.056508 0.021785 0.019960 0.001388 0.001090 0.003513
  20 0.117686 0.040176 0.042203 -.020867 -.011070 0.006479
  21 0.085152 0.018475 0.029020 0.001713 -.003937 -.002689
 #END
