# Supplementary material
Source: publisher figshare collection journal article supplement (https://acs.figshare.com/ndownloader/files/4299946)
Supplement: Supplementary file 1 [file 4299946 › PGLOH_Pna21_calc.cif]

 #########################################################
 #  CIF FILE GENERATED FROM SYMMETRY AVERAGED POSITIONS  #
 #      USING MAPPING PROGRAM TO COLLATE MD RUN DATA     #
 ###################################################AMR###
 data_CSD_CIF_MAPPER
 _audit_creation_date 2007-01-22
 _audit_creation_method MAPPER_PROG
 _cell_volume    717.6682    
 _symmetry_cell_setting orthorhombic
 _symmetry_space_group_name_H-M 'PNA21'
 _symmetry_Int_Tables_number 33
 loop_
 _symmetry_equiv_pos_site_id
 _symmetry_equiv_pos_as_xyz
 1  x,y,z
 2 -x,-y,z+1/2
 3  x+1/2,-y+1/2,z
 4  -x+1/2,y+1/2,z+1/2
 _cell_length_a   6.601000    
 _cell_length_b   8.037700    
 _cell_length_c   13.52640    
 _cell_angle_alpha   90.00000    
 _cell_angle_beta   90.00000    
 _cell_angle_gamma   90.00000    
 loop_
 _atom_type_symbol
 _atom_type_radius_bond
 C 0.68
 D 0.23
 H 0.23
 N 0.68
 O 0.68
 Li 0.70
 loop_
 _atom_site_label
 _atom_site_type_symbol
 _atom_site_U_iso_or_equiv
 _atom_site_fract_x
 _atom_site_fract_y
 _atom_site_fract_z
   1 C   Uani 0.125699 0.566769 0.837250
   2 C   Uani 0.118927 0.392204 0.838132
   3 C   Uani 0.124593 0.567784 0.662539
   4 C   Uani 0.118046 0.393137 0.660490
   5 C   Uani 0.116299 0.306991 0.749190
   6 C   Uani 0.129069 0.657332 0.750087
   7 O   Uani 0.127594 0.645002 0.925303
   8 O   Uani 0.125153 0.647577 0.575013
   9 O   Uani 0.112188 0.137180 0.752242
  10 O   Uani 0.640923 0.517997 0.575354
  11 O   Uani 0.359750 0.476539 0.429883
  12 H   Uani 0.115957 0.324459 0.905767
  13 H   Uani 0.136733 0.767775 0.918735
  14 H   Uani 0.116694 0.088257 0.686460
  15 H   Uani 0.113884 0.326602 0.592304
  16 H   Uani 0.136099 0.770109 0.582472
  17 H   Uani 0.134125 0.791921 0.750143
  18 H   Uani 0.537445 0.500567 0.526575
  19 H   Uani 0.758486 0.480855 0.542878
  20 H   Uani 0.241108 0.522719 0.457497
  21 H   Uani 0.378221 0.532545 0.366810
 loop_
 _atom_site_aniso_label
 _atom_site_aniso_U_11
 _atom_site_aniso_U_22
 _atom_site_aniso_U_33
 _atom_site_aniso_U_12
 _atom_site_aniso_U_23
 _atom_site_aniso_U_13
   1 0.081224 0.034094 0.016462 0.001953 -.001897 -.002648
   2 0.087858 0.034123 0.016727 -.000554 -.000114 0.001895
   3 0.100576 0.032069 0.017013 0.003946 0.000901 0.004815
   4 0.100662 0.032153 0.016745 0.001985 -.000651 0.000268
   5 0.025924 0.030600 0.016723 -.001731 0.000040 0.000347
   6 0.031602 0.031204 0.019396 0.001808 -.000706 0.000501
   7 0.311764 0.039606 0.023016 0.007338 -.004446 -.011200
   8 0.361760 0.036332 0.025523 0.010296 0.003774 0.015122
   9 0.052411 0.031602 0.024014 -.003528 0.000351 -.000536
  10 0.197005 0.048811 0.029482 -.000089 0.000997 -.001148
  11 0.204073 0.046489 0.035006 0.004433 0.007136 0.000547
  12 0.273618 0.047081 0.025459 0.000476 0.006180 0.004958
  13 0.261438 0.041374 0.030717 0.006820 -.005527 -.009496
  14 0.093093 0.036710 0.031651 -.001935 -.005088 -.005212
  15 0.292412 0.043272 0.024641 0.003519 -.006513 -.002185
  16 0.303498 0.037390 0.033977 0.009594 0.004970 0.014057
  17 0.090045 0.032938 0.037983 0.002473 -.000912 0.000446
  18 0.262202 0.048522 0.055643 0.005292 -.003338 -.036661
  19 0.233093 0.098327 0.092384 0.006297 0.028795 0.051183
  20 0.227303 0.086530 0.099449 0.012537 0.026835 0.046786
  21 0.175430 0.056480 0.038350 -.003606 0.008827 -.002530
 #END
