# Supplementary material
Source: publisher figshare collection journal article supplement (https://acs.figshare.com/ndownloader/files/4299946)
Supplement: Supplementary file 1 [file 4299946 › phloro_expt.cif]

#\#CIF_1.1
 
#  CIF produced by WinGX routine CIF_UPDATE
#  Created on 2010-05-31 at 11:49:47
#  Using CIFtbx version 2.6.2 16 Jun 1998
 
#  Dictionary name : cif_core.dic
#  Dictionary vers : 2.4
#  Request file    : c:\wingx old2\files\acta.reqdat
#  CIF files read  : phloro_100k
 
#------------------ SECTION 1. GLOBAL INFORMATION ---------------------------#
 
data_global
 

_publ_section_references
;
#
# Put here all your general crystallographic references
# Unecessary ones can be deleted from the document CIF
#
 
ABSCOR: Higashi, T. (1995). ABSCOR. Rigaku Corporation, Tokyo, Japan.
 
Mercury: Macrae, C. F., Edgington, P. R., McCabe, P., Pidcock, E., Shields,
G. P., Taylor, R., Towler, M. & van de Streek, J. (2006). J. Appl. Cryst.
39, 453-457.
 
PROCESS: Rigaku (1996). PROCESS. Rigaku Corporation, Tokyo, Japan.
 
SHELX Sheldrick, G. M. (2008). Acta Cryst. A64, 112-122.
 
WinGX: Farrugia, L. J. (1999). J. Appl. Cryst. 32, 837-838.
 
;
#  List of references should be in alphabetical sequence with one blank
#  line between each reference.  See Notes for Authors for full
#  specifications as to how references should be presented.
#  Scattering-factor references are not needed here
#
#------------------  SECTION 2. COMPOUND(S) DETAILS -------------------------#
 
data_phloro_100k
 
_audit_creation_date                    2010-05-31T11:49:47-00:00
_audit_creation_method                  'WinGX routine CIF_UPDATE'
 
#==============================================================================
 
# CHEMICAL DATA
 
_chemical_name_systematic
;
 phloroglucinol dihydrate
;
_chemical_formula_sum                   'C6 H10 O5'
_chemical_formula_weight                162.14
 
#==============================================================================
 
# CRYSTAL DATA
 
loop_
    _symmetry_equiv_pos_as_xyz
'x, y, z'
'-x+1/2, -y, z+1/2'
'x+1/2, -y+1/2, -z+1/2'
'-x, y+1/2, -z'
'-x, -y, -z'
'x-1/2, y, -z-1/2'
'-x-1/2, y-1/2, z-1/2'
'x, -y-1/2, z'
 
_cell_length_a                          6.5942(4)
_cell_length_b                          13.5455(9)
_cell_length_c                          8.0423(3)
_cell_angle_alpha                       90
_cell_angle_beta                        90
_cell_angle_gamma                       90
_cell_volume                            718.35(7)
_cell_formula_units_Z                   4

_symmetry_cell_setting            'Orthorhombic' 
_symmetry_space_group_name_H-M    'Pnma ' 

_cell_measurement_temperature           100(2)
_cell_measurement_reflns_used           4260
_cell_measurement_theta_min             6.02
_cell_measurement_theta_max             55.22

_exptl_crystal_description        'block' 
_exptl_crystal_colour             'orange' 
_exptl_crystal_size_min           0.20 
_exptl_crystal_size_mid           0.3 
_exptl_crystal_size_max           0.40 

_exptl_crystal_density_diffrn           1.499
_exptl_crystal_density_method           'not measured'
_exptl_crystal_F_000                    344
_exptl_absorpt_coefficient_mu           0.132
_exptl_absorpt_correction_type          'multi-scan'
_exptl_absorpt_correction_T_min    0.8974
_exptl_absorpt_correction_T_max    0.9682 
_exptl_absorpt_process_details     'ABSCOR, Rigaku 1995'

 
#==============================================================================
 
# EXPERIMENTAL DATA
 
_exptl_special_details
;
 ?
;
_diffrn_ambient_temperature             100(2)
_diffrn_radiation_type                  MoK\a
_diffrn_measurement_device_type   
'Rigaku R-AXIS RAPID IP Image Plate diffractometer' 
_diffrn_radiation_wavelength            0.71075
_diffrn_radiation_monochromator         graphite
_diffrn_reflns_number                   4781
_diffrn_reflns_av_R_equivalents         0.0171
_diffrn_reflns_av_unetI/netI            0.0138
_diffrn_reflns_theta_min                3.01
_diffrn_reflns_theta_max                27.47
_diffrn_reflns_theta_full               27.47
_diffrn_measured_fraction_theta_max
                                        0.993
_diffrn_measured_fraction_theta_full
                                        0.993
_diffrn_reflns_limit_h_min              -8
_diffrn_reflns_limit_h_max              8
_diffrn_reflns_limit_k_min              -17
_diffrn_reflns_limit_k_max              17
_diffrn_reflns_limit_l_min              -10
_diffrn_reflns_limit_l_max              10
 
#==============================================================================
 
# STRUCTURE SOLUTION
 
_atom_sites_solution_primary            direct
_atom_sites_solution_secondary          difmap
_atom_sites_solution_hydrogens          geom
 
#==============================================================================
 
# REFINEMENT DATA
 
_refine_special_details
;
 Refinement of F^2^ against ALL reflections.  The weighted R-factor wR and
 goodness of fit S are based on F^2^, conventional R-factors R are based
 on F, with F set to zero for negative F^2^. The threshold expression of
 F^2^ > 2\s(F^2^) is used only for calculating R-factors(gt) etc. and is
 not relevant to the choice of reflections for refinement.  R-factors based
 on F^2^ are statistically about twice as large as those based on F, and R-
 factors based on ALL data will be even larger.
;
_reflns_number_total                    860
_reflns_number_gt                       818
_reflns_threshold_expression            >2\s(I)
_refine_ls_structure_factor_coef        Fsqd
_refine_ls_matrix_type                  full
_refine_ls_R_factor_all                 0.0362
_refine_ls_R_factor_gt                  0.0357
_refine_ls_wR_factor_ref                0.1086
_refine_ls_goodness_of_fit_ref          1.132
_refine_ls_restrained_S_all             1.132
_refine_ls_number_reflns                860
_refine_ls_number_parameters            82
_refine_ls_number_restraints            0
_refine_ls_hydrogen_treatment           refall
_refine_ls_weighting_scheme             calc
_refine_ls_weighting_details
         'calc w=1/[\s^2^(Fo^2^)+(0.0738P)^2^+0.1241P] where P=(Fo^2^+2Fc^2^)/3'
_refine_ls_shift/su_max                 0.002
_refine_ls_shift/su_mean                0
_refine_diff_density_max                0.23
_refine_diff_density_min                -0.346
_refine_diff_density_rms                0.081
_refine_ls_extinction_method            none
loop_
    _atom_type_symbol
    _atom_type_description
    _atom_type_scat_dispersion_real
    _atom_type_scat_dispersion_imag
    _atom_type_scat_source
C C 0.0033 0.0016 'International Tables Vol C Tables 4.2.6.8 and 6.1.1.4'
H H 0 0 'International Tables Vol C Tables 4.2.6.8 and 6.1.1.4'
O O 0.0106 0.006 'International Tables Vol C Tables 4.2.6.8 and 6.1.1.4'
 

_computing_data_collection        'D*TREK/CRYSTALCLEAR (Rigaku, 2006)' 
_computing_cell_refinement        'FSPROCESS/CRYSTALCLEAR (Rigaku, 2006)'
_computing_data_reduction         
'FSPROCESS/CRYSTALCLEAR (Rigaku, 2006), WinGX (Farrugia, 1999)' 
_computing_structure_solution     'SHELXS-97 (Sheldrick, 2008)' 
_computing_structure_refinement         'SHELXL-97 (Sheldrick, 2008)'
 
#==============================================================================
 
# ATOMIC COORDINATES AND DISPLACEMENT PARAMETERS
 
loop_
    _atom_site_label
    _atom_site_fract_x
    _atom_site_fract_y
    _atom_site_fract_z
    _atom_site_U_iso_or_equiv
    _atom_site_adp_type
    _atom_site_calc_flag
    _atom_site_refinement_flags
    _atom_site_occupancy
    _atom_site_disorder_assembly
    _atom_site_disorder_group
    _atom_site_type_symbol
C4 0.11951(18) 0.25 1.13105(17) 0.0145(3) Uani d S 1 . . C
H2 0.1131(15) 0.4043(11) 0.8100(18) 0.018(3) Uiso d . 1 . . H
H5 0.247(3) 0.4570(11) 0.497(2) 0.048(5) Uiso d . 1 . . H
H3 0.1256(16) 0.4214(11) 1.228(2) 0.027(4) Uiso d . 1 . . H
H4 0.1222(18) 0.25 1.252(3) 0.011(4) Uiso d S 1 . . H
H7 0.050(4) 0.475(2) 0.498(4) 0.029(7) Uiso d P 0.5 . . H
H6 0.128(3) 0.370(2) 0.496(4) 0.012(5) Uiso d P 0.5 . . H
H1 0.118(3) 0.305(2) 0.577(4) 0.013(6) Uiso d P 0.5 . . H
O1 0.10844(13) 0.25 0.61438(12) 0.0156(3) Uani d S 1 . . O
O3 0.14097(11) 0.42888(5) 0.45709(9) 0.0185(3) Uani d . 1 . . O
O2 0.11606(11) 0.42808(5) 1.12121(10) 0.0205(3) Uani d . 1 . . O
C2 0.11295(13) 0.33972(6) 0.86899(12) 0.0149(3) Uani d . 1 . . C
C1 0.11172(16) 0.25 0.78431(17) 0.0134(3) Uani d S 1 . . C
C3 0.11702(13) 0.33839(7) 1.04207(12) 0.0146(3) Uani d . 1 . . C
 
loop_
    _atom_site_aniso_label
    _atom_site_aniso_U_11
    _atom_site_aniso_U_22
    _atom_site_aniso_U_33
    _atom_site_aniso_U_12
    _atom_site_aniso_U_13
    _atom_site_aniso_U_23
C4 0.0180(6) 0.0147(7) 0.0108(7) 0 0.0002(4) 0
O1 0.0226(5) 0.0142(6) 0.0101(5) 0 -0.0003(3) 0
O3 0.0247(4) 0.0143(4) 0.0165(4) -0.0002(3) -0.0010(2) 0.0004(2)
O2 0.0370(5) 0.0124(4) 0.0121(5) 0.0012(2) 0.0014(3) -0.0014(2)
C2 0.0183(5) 0.0136(5) 0.0129(6) 0.0012(3) 0.0004(3) 0.0008(3)
C1 0.0123(5) 0.0157(7) 0.0123(7) 0 -0.0002(4) 0
C3 0.0170(5) 0.0131(5) 0.0137(6) 0.0010(3) 0.0004(3) -0.0016(3)
 
 
#==============================================================================
 
# MOLECULAR GEOMETRY
 
_geom_special_details
;
 All s.u.'s (except the s.u. in the dihedral angle between two l.s. planes)
 are estimated using the full covariance matrix.  The cell s.u.'s are taken
 into account individually in the estimation of s.u.'s in distances, angles
 and torsion angles; correlations between s.u.'s in cell parameters are only
 used when they are defined by crystal symmetry.  An approximate (isotropic)
 treatment of cell s.u.'s is used for estimating s.u.'s involving l.s. planes.
;
loop_
    _geom_bond_atom_site_label_1
    _geom_bond_atom_site_label_2
    _geom_bond_site_symmetry_2
    _geom_bond_distance
    _geom_bond_publ_flag
C4 C3 8_565 1.3949(11) ?
C4 C3 . 1.3949(11) ?
C4 H4 . 0.98(2) ?
O1 C1 . 1.3669(17) ?
O1 H1 . 0.80(3) ?
O3 H5 . 0.860(18) ?
O3 H7 . 0.93(3) ?
O3 H6 . 0.87(3) ?
O2 C3 . 1.3716(11) ?
O2 H3 . 0.865(19) ?
C2 C3 . 1.3923(14) ?
C2 C1 . 1.3931(11) ?
C2 H2 . 0.995(16) ?
C1 C2 8_565 1.3931(11) ?
 
loop_
    _geom_angle_atom_site_label_1
    _geom_angle_atom_site_label_2
    _geom_angle_atom_site_label_3
    _geom_angle
    _geom_angle_site_symmetry_1
    _geom_angle_site_symmetry_3
    _geom_angle_publ_flag
C3 C4 C3 118.25(12) 8_565 . ?
C3 C4 H4 120.88(6) 8_565 . ?
C3 C4 H4 120.88(6) . . ?
C1 O1 H1 112(2) . . ?
H5 O3 H7 96(2) . . ?
H5 O3 H6 111.0(18) . . ?
H7 O3 H6 116(2) . . ?
C3 O2 H3 111.6(10) . . ?
C3 C2 C1 118.52(9) . . ?
C3 C2 H2 119.2(8) . . ?
C1 C2 H2 122.2(8) . . ?
O1 C1 C2 119.27(6) . . ?
O1 C1 C2 119.27(6) . 8_565 ?
C2 C1 C2 121.47(12) . 8_565 ?
O2 C3 C2 116.89(8) . . ?
O2 C3 C4 121.48(8) . . ?
C2 C3 C4 121.62(9) . . ?
 
loop_
    _geom_torsion_atom_site_label_1
    _geom_torsion_atom_site_label_2
    _geom_torsion_atom_site_label_3
    _geom_torsion_atom_site_label_4
    _geom_torsion
    _geom_torsion_site_symmetry_1
    _geom_torsion_site_symmetry_2
    _geom_torsion_site_symmetry_3
    _geom_torsion_site_symmetry_4
    _geom_torsion_publ_flag
C3 C2 C1 O1 -179.78(8) . . . . ?
C3 C2 C1 C2 0.48(16) . . . 8_565 ?
C1 C2 C3 O2 -179.36(8) . . . . ?
C1 C2 C3 C4 -0.11(13) . . . . ?
C3 C4 C3 O2 178.97(6) 8_565 . . . ?
C3 C4 C3 C2 -0.25(16) 8_565 . . . ?
 
loop_
    _geom_hbond_atom_site_label_D
    _geom_hbond_atom_site_label_H
    _geom_hbond_atom_site_label_A
    _geom_hbond_distance_DH
    _geom_hbond_distance_HA
    _geom_hbond_distance_DA
    _geom_hbond_angle_DHA
    _geom_hbond_site_symmetry_A
O2 H3 O3 0.865(19) 1.85(2) 2.7063(11) 170.8(14) 1_556
O3 H7 O3 0.93(3) 1.84(2) 2.7650(15) 171(3) 5_566
 
# The following lines are used to test the character set of files sent by
# network email or other means. They are not part of the CIF data set
# abcdefghijklmnopqrstuvwxyzABCDEFGHIJKLMNOPQRSTUVWXYZ0123456789
# !@#$%^&*()_+{}:"~<>?|\-=[];'`,./
 
# END of CIF
